# Supplementary material
Source: Springer Nature journal article supplement (https://www.springermedizin.de/resource/supplementary/12875_2005_124_MOESM3_ESM.pdf/9436338)

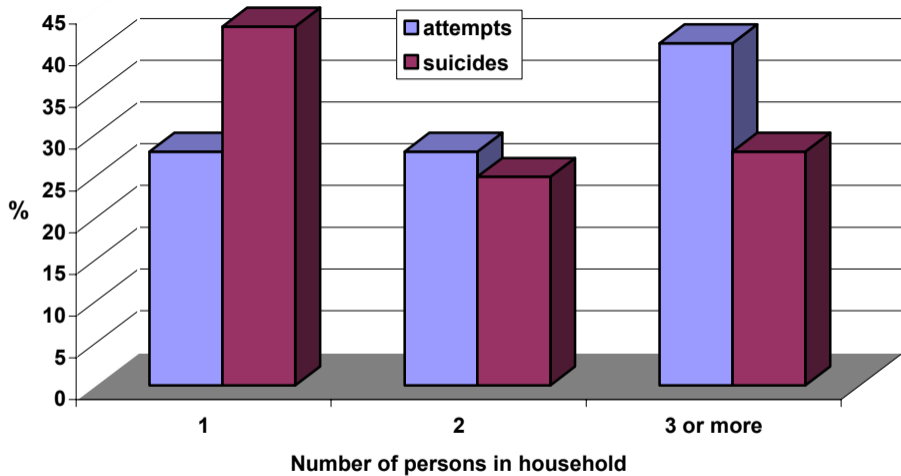

Supplement: MOESM3 [file 9436338]
